# Supplementary material for: Magnetic memory based on magnetic alignment of a paramagnetic ionic liquid near room temperature
Source: Royal Society of Chemistry journal article supplement (doi:10.1039/c0cc05820c), 2011-01-01
Supplement: c0cc05820c.pdf [file c0cc05820c.pdf]

# Magnetic Memory Based on Magnetic Alignment of a Paramagnetic Ionic Liquid near Room Temperature

Yusuke Funasako,<sup>a</sup> Tomoyuki Mochida,<sup>a</sup> Takashi Inagaki,<sup>a</sup> Takahiro Sakurai,<sup>b</sup> Hitoshi Ohta,<sup>c</sup> Ko Furukawa,<sup>d</sup>  
and Toshikazu Nakamura<sup>d</sup>

<sup>a</sup>Department of Chemistry, Graduate School of Science, Kobe University, <sup>b</sup>Center for Supports to Research and Education Activities, Kobe University, <sup>c</sup>Molecular Photoscience Research Center, Kobe University, and <sup>d</sup>Institute for Molecular Science, Japan

## Supporting Information

### General methods

All reagents and solvents were commercially available and have been used without further purification except for octamethylferrocene<sup>S1</sup> and AgTFSA<sup>S2</sup>, which were synthesized according to a literature method. <sup>1</sup>H NMR spectra were recorded by using a JEOL JNM-ECL-400 spectrometer operating at 400 MHz. Elemental analyses were performed with a Yanaco CHN corder MT5. Magnetic measurements were carried out using a Quantum Design MPMS-XL7 SQUID susceptometer. ESR measurements were performed with a JEOL TE-260 X-band ESR spectrometer at 3.8 K. X-ray Diffraction (XRD) measurements were performed using Rigaku SmartLab X-ray Diffractometer equipped with Cu K $\alpha$  radiation ( $\lambda = 1.54056 \text{ \AA}$ ). DSC measurements were performed using a TA Instrument Q100 differential scanning calorimeter at a rate of 10 K min<sup>-1</sup>.

### Preparation of [butyloctamethylferrocenium][TFSA] (1)

**1-Hydroxybutyloctamethylferrocene.** All the manipulations were carried out under a nitrogen atmosphere. Propyl bromide (1.0 mL, 11.0 mmol) was added dropwise to a stirred mixture of magnesium turnings (0.312 g, 12.8 mmol) and diethyl ether (15 mL), and the solution was stirred until most of the magnesium dissolve. The Grignard reagent thus prepared was added slowly to a solution of octamethylferrocene (0.502 g, 1.54 mmol) in dry THF (20 mL) cooled at -78 °C, and the solution was stirred for 30 min. The reaction mixture was quenched at -78 °C with saturated NH<sub>4</sub>Cl solution (10 mL) and extracted with Et<sub>2</sub>O. The organic layer was dried over magnesium sulfate and concentrated under reduced pressure. The crude product was purified by column chromatography (silica, CH<sub>2</sub>Cl<sub>2</sub>). The product was obtained as a yellow solid (0.447 g, 78.4% yield). <sup>1</sup>H NMR (400 MHz, CDCl<sub>3</sub>, TMS):  $\delta = 0.88$  (m, 3H), 1.27 (m, 2H), 1.44 (m, 2H), 1.69–1.76 (br., 23H), 1.90 (s, 3H), 2.30 (s, 1H), 3.55 (s, 1H), 4.33 (s, 1H).

**Butyloctamethylferrocene.** To a stirred solution of 1-hydroxybutyloctamethylferrocene (0.670 g, 1.75 mmol) in THF (15 mL) was added a solution of  $\text{BH}_3\cdot\text{SMe}_2$  (2.6 mL, 5.24 mmol) in THF (2 M). After refluxing the solution for 1 hour, the reaction was quenched with aqueous  $\text{NH}_4\text{Cl}$  (10 mL), and the solution extracted with  $\text{CH}_2\text{Cl}_2$ . The organic layer was dried over magnesium sulfate and concentrated under reduced pressure. The crude product was purified by column chromatography (alumina, pentane). The product was obtained as a yellow oil (0.449 g, yield 70.0%).  $^1\text{H}$  NMR (400 MHz,  $\text{CDCl}_3$ , TMS);  $\delta$  = 0.88 (t, 3H,  $J$  = 7.2 Hz), 1.25–1.30 (m, 4H), 1.65 (s, 3H), 1.72 (m, 18H), 2.18 (t, 2H,  $J$  = 7.6 Hz), 3.21 (s, 1H). Anal. Calcd. for  $\text{C}_{22}\text{H}_{34}\text{Fe}$  (354.4): C, 74.57; H, 9.67. Found: C, 74.37; H, 9.77. The other compounds were prepared in a similar manner as described above.

**[Butyloctamethylferrocenium][TFSA] (1).** Under dark,  $\text{AgTFSA}$  (76.0 mg, 0.20 mmol) was added to a solution of butyloctamethylferrocene (60.4 mg, 0.18 mmol) in  $\text{CH}_2\text{Cl}_2$  (10 mL). After stirring the solution for a few minutes, the mixture was filtered via a syringe equipped with a membrane filter to remove silver deposits and unreacted  $\text{AgTFSA}$ . Removal of the solvent from the filtrate under reduced pressure gave the product as a dark green solid (82.4 mg, 72% yield). Product of the reaction was dried under vacuum at 80 °C for 24 hours. Recrystallization from ethanol / hexane gave analytically pure product. Dark green plate crystal.  $^1\text{H}$  NMR (400 MHz,  $\text{CDCl}_3$ , TMS):  $\delta$  = 3.18 (s, 24H), 7.43 (br., 1H), 16.72 (br., 9H). Anal. Calcd. for  $\text{C}_{24}\text{H}_{34}\text{F}_6\text{FeNO}_4\text{S}_2$  (634.5): C, 45.43; H, 5.40; N, 2.21. Found: C, 45.58; H, 5.50; N, 2.42. The other TFSA salts were prepared in a similar manner.

### Single crystal X-ray structure determination of 1

Single crystal of **1** for X-ray structure determination was obtained by recrystallization from ethanol / hexane at -14 °C. X-ray diffraction data were collected on a Bruker Smart1000 CCD diffractometer using Mo  $\text{K}\alpha$  radiation ( $\lambda$  = 0.71073 Å). The structures were solved by direct method and refined by using SHELXTL. Crystallographic parameters:  $M_w$  = 634.49, orthorhombic, space group  $Pna2_1$ , with unit cell  $a$  = 26.602(3) Å,  $b$  = 8.773(5) Å,  $c$  = 11.901(6) Å, and  $V$  = 2777.8(5) Å<sup>3</sup>.  $Z$  = 4,  $D_{\text{calcd.}}$  = 1.517  $\text{gcm}^{-3}$ ,  $R1(I > 2\sigma(I))$  = 0.0254,  $wR2$  = 0.0617,  $R1(\text{all data})$  = 0.0237,  $wR2$  = 0.0596, 4875 independent reflections ( $R(\text{int})$  = 0.0239), 352 parameters refined on  $F^2$ . Crystallographic data (excluding structure factors) for the structure have been deposited with the Cambridge Crystallographic Data Centre as supplementary publication no. 775548.

### Thermal and magnetic properties of 1

DSC measurements revealed that **1** melted at 34.3 °C ( $\Delta H$  = 26.7  $\text{kJ mol}^{-1}$ ,  $\Delta S$  = 86.3  $\text{JK}^{-1}\text{mol}^{-1}$ ) on heating and crystallized at 18.9 °C on cooling, and no other phase transitions were observed down to 93 K. Temperature dependence of magnetic susceptibility for **1** measured under 0.1 T is shown in Figure S1. This salt showed a simple paramagnetic behavior, while a slight decrease was observed below about 70 K, which is ascribed to the decrease of orbital contribution.

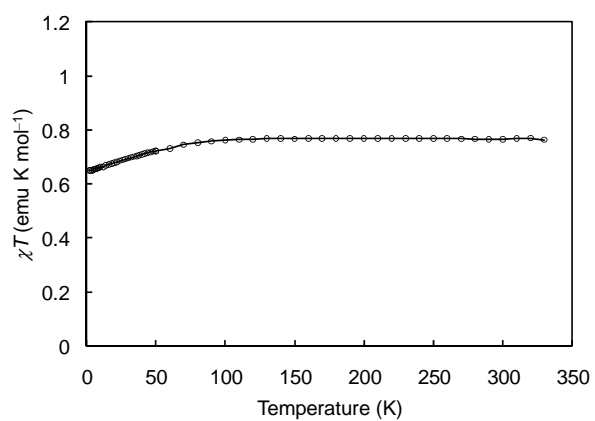

**Figure S1.** Temperature dependence of magnetic susceptibility of **1** measured under 0.1 T.

(S1) A. Vij, Y. Y. Zheng, R. L. Kirchmeier, J. M. Shreeve, *Inorg. Chem.*, **33**, 3281 (1994).

(S2) C. Zou, M. S. Wrighton, *J. Am. Chem. Soc.*, **112**, 7578 (1990).
